# Supplementary material for: Female-germline specific protein Sakura interacts with Otu and is crucial for germline stem cell renewal and differentiation and oogenesis
Source: eLife journal article supplement (doi:10.7554/elife.103828), 2024-11-27

Figure 1C

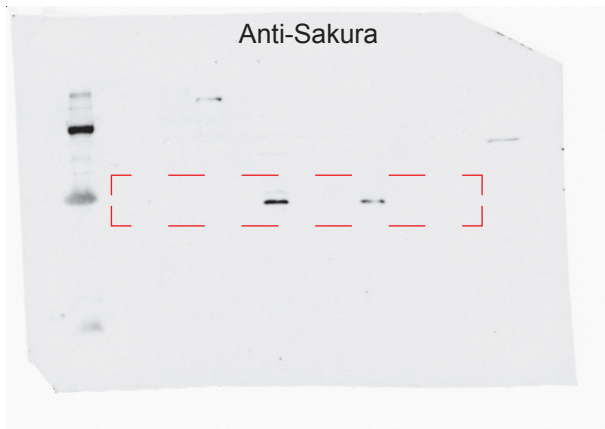

Figure 1D

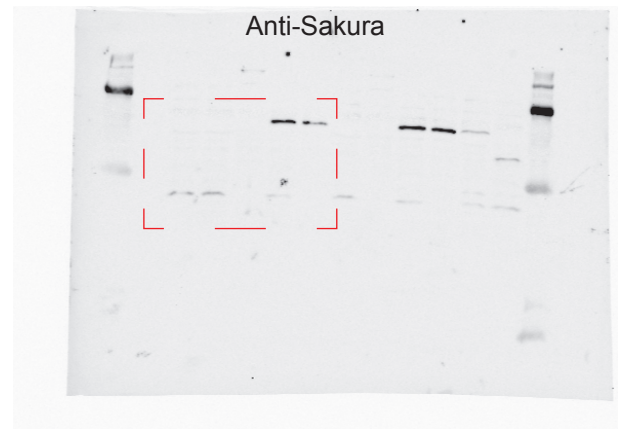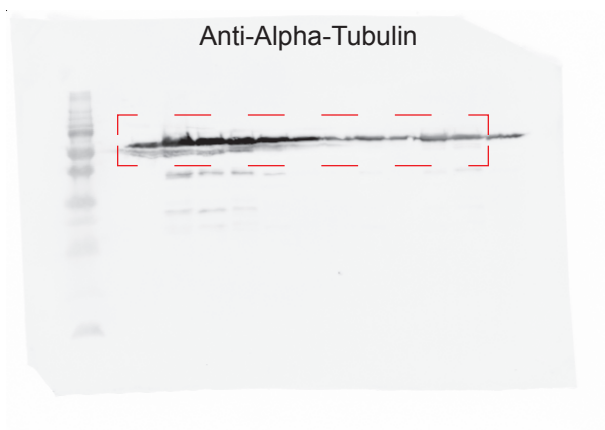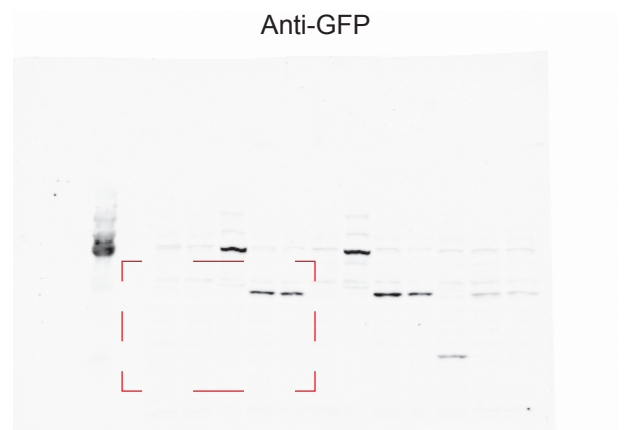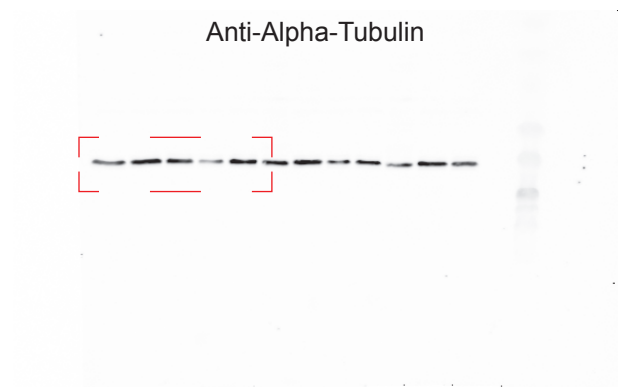

Supplement: fig1-data1 [file elife-103828-fig1-data1-v1.pdf]
