# Supplementary material for: Female-germline specific protein Sakura interacts with Otu and is crucial for germline stem cell renewal and differentiation and oogenesis
Source: eLife journal article supplement (doi:10.7554/elife.103828), 2024-11-27

Figure 8A

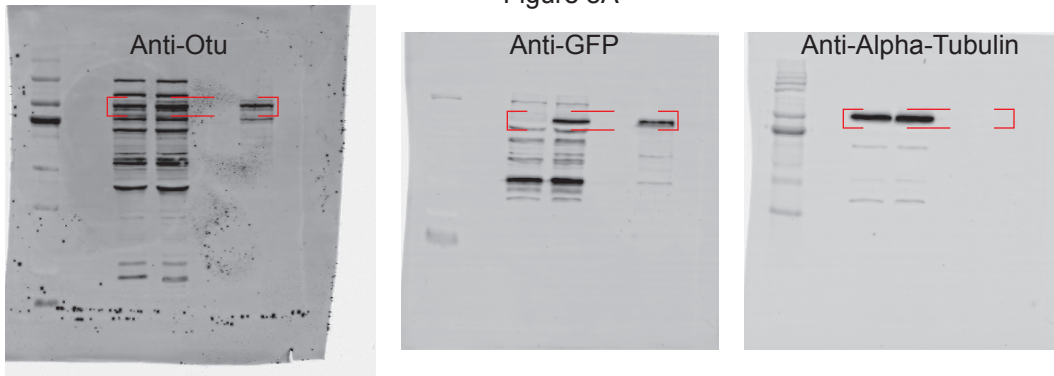

Figure 8B

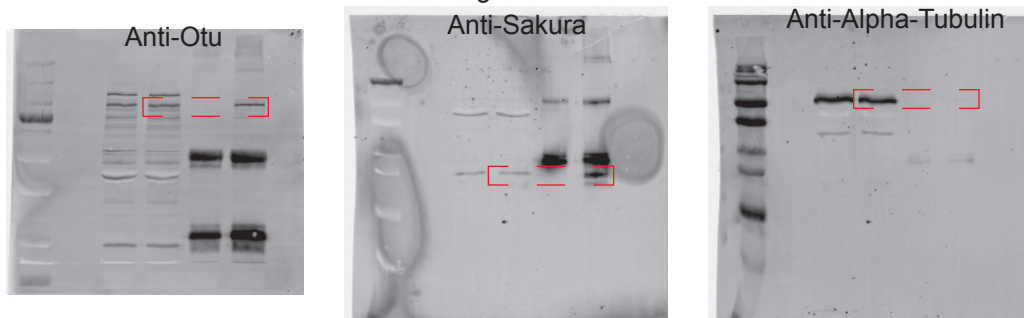

Figure 8C  
Anti-HA

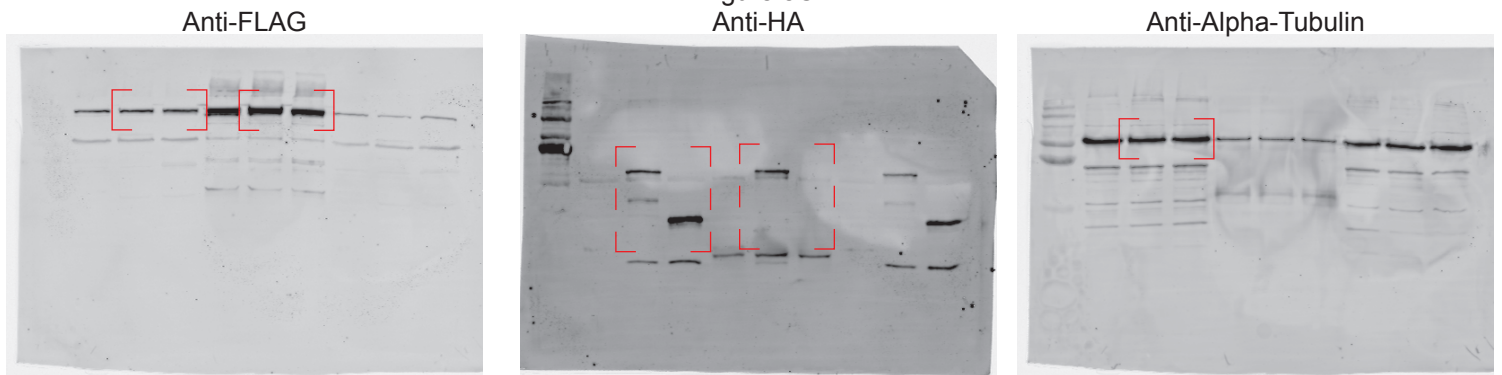

Figure 8-figure supplement 1-A  
Anti-Otu Anti-Alpha-Tubulin

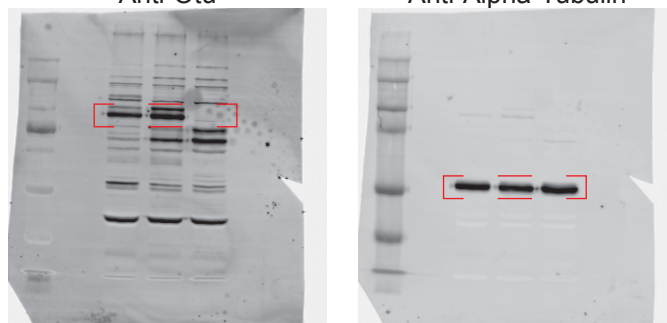

Figure 8-figure supplement 1-B

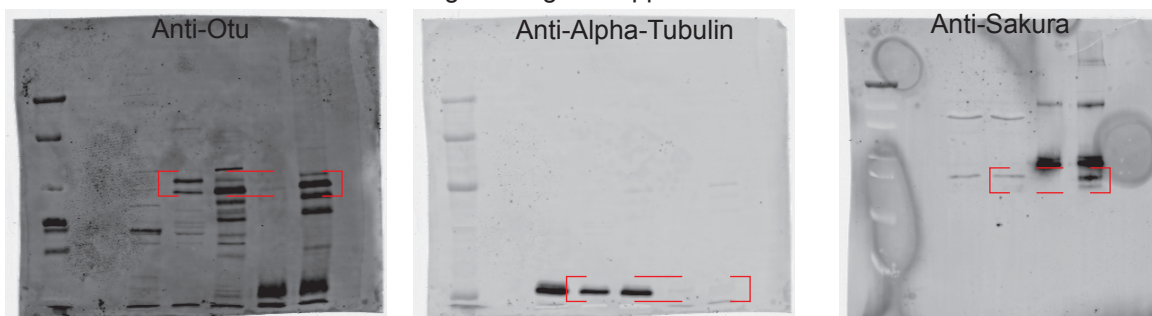

Supplement: fig8-data1 [file elife-103828-fig8-data1-v1.pdf]
