# Supplementary material for: Female-germline specific protein Sakura interacts with Otu and is crucial for germline stem cell renewal and differentiation and oogenesis
Source: eLife journal article supplement (doi:10.7554/elife.103828), 2024-11-27

Figure 10C

Anti-Otu

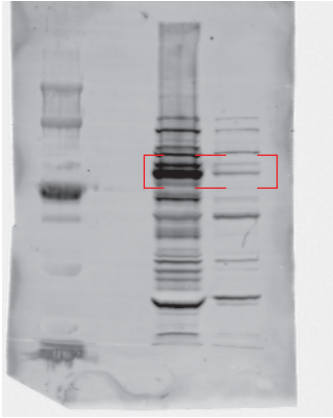

Anti-Alpha-Tubulin

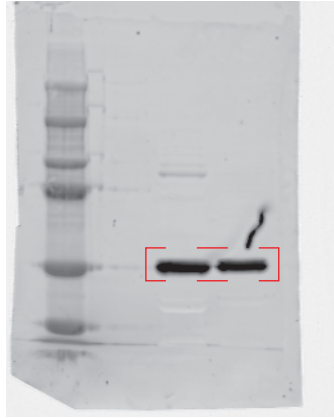

Anti-Otu

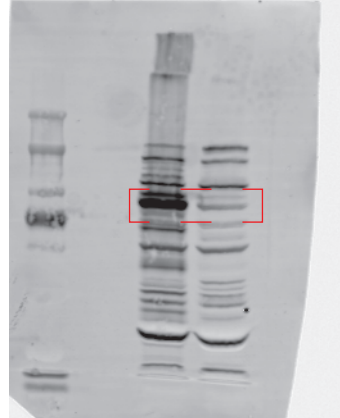

Anti-Alpha-Tubulin

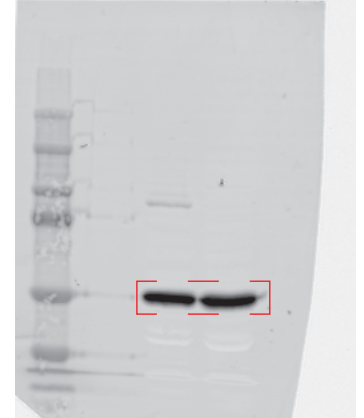

Figure 10-figure supplement 1-A

Anti-Sakura

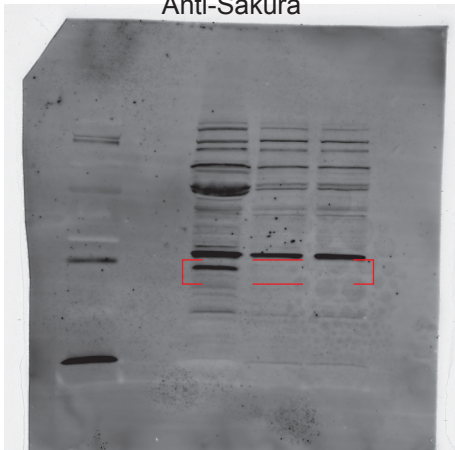

Anti-Otu

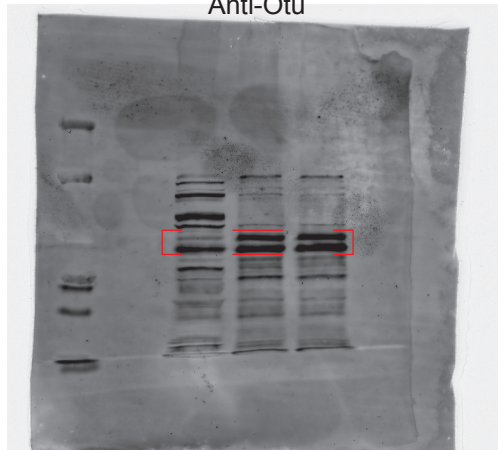

Anti-Alpha-Tubulin

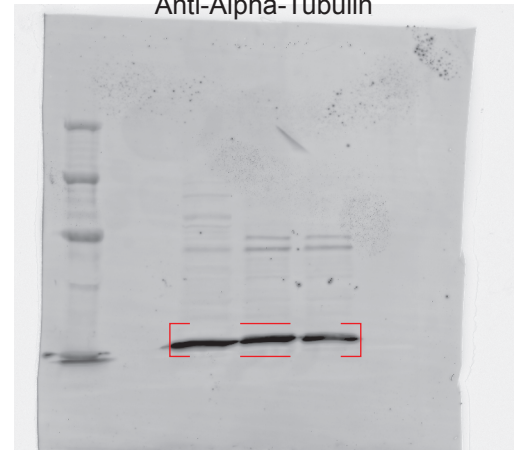

Figure 10-figure supplement 1-B

Anti-Otu

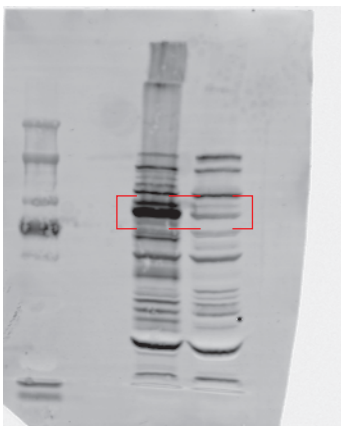

Anti-Sakura

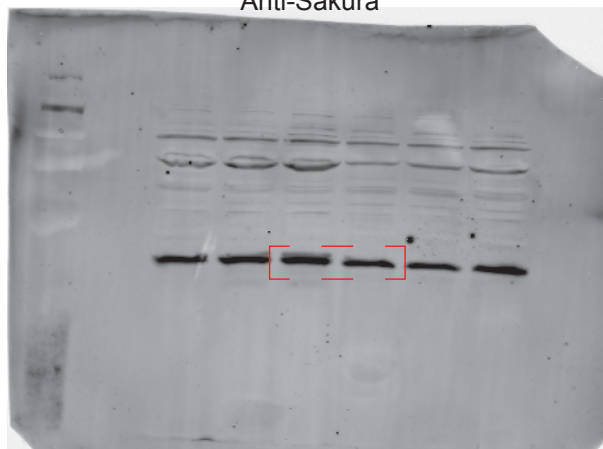

Anti-Alpha-Tubulin

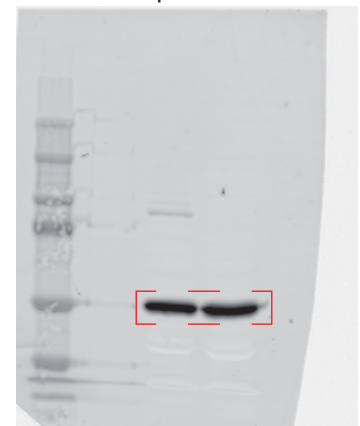

Supplement: fig10-data1 [file elife-103828-fig10-data1-v1.pdf]
